# Supplementary material
Source: ML conference proceedings conference paper supplement (https://openaccess.thecvf.com/content/WACV2024/html/Hsiao_Natural_Light_Can_WACV_2024_paper.html)
Supplement: Supplementary file 1 [file Hsiao_Natural_Light_Can_WACV_2024_supplemental.zip]

---

**Algorithm 1:** Zeroth-Order Optimization of Natural Light attack

---

**Input:** Victim classifier  $f$ , Input image  $x$ , Ground truth  $y$ , Light generator  $\mathcal{G}$ , Update times  $t_{max}$ , Distribution of parameter  $P$ , Step size of estimate gradient  $\delta$ , Step size of optimize  $\gamma$ , Restart threshold  $\tau$

**Output:** Adversarial image  $x_{adv}^*$  with maxi. score

```
1  $x_{adv}^* \leftarrow x$ 
2  $score^* \leftarrow \mathcal{L}_{CE}(y, f(x_{adv}^*))$ 
3 // Optimize  $k$  rounds
4 for  $i \leftarrow 1$  to  $k$  do
5   sample  $\mathcal{P}$  from  $P$ 
6   // Optimize each  $\mathcal{P}$   $t_{max}$  times
7   for  $t \leftarrow 1$  to  $t_{max}$  do
8      $x_{adv} \leftarrow x + \mathcal{G}(x, \mathcal{M}_{\mathcal{P}})$ 
9      $score \leftarrow \mathcal{L}_{CE}(y, f(x_{adv}))$ 
10    if  $score > score^*$  then
11       $x_{adv}^* \leftarrow x_{adv}$ 
12       $score^* \leftarrow score$ 
13    // Estimate gradient of each parameter in  $\mathcal{P}$ 
14    for  $\mathcal{P}_j$  in  $\mathcal{P}$  do
15       $\mathcal{P}_j \leftarrow \mathcal{P}_j + \delta$ 
16       $x_{adv}^{(j)} \leftarrow x + \mathcal{G}(x, \mathcal{M}_{\mathcal{P}})$ 
17       $score^{(j)} \leftarrow \mathcal{L}_{CE}(y, f(x_{adv}^{(j)}))$ 
18       $grad_j \leftarrow (score^{(j)} - score)/\delta$ 
19      if  $score > score^*$  then
20         $x_{adv}^* \leftarrow x_{adv}^{(j)}$ 
21         $score^* \leftarrow score^{(j)}$ 
22       $\mathcal{P}_j \leftarrow \mathcal{P}_j - \delta$ 
23    // Random start with vanish gradient
24    if  $\|grad\|_2 < \tau$  then
25      sample  $\mathcal{P}$  from  $P$ 
26    // Update parameter
27    else
28       $\mathcal{P} \leftarrow \mathcal{P} + \gamma \frac{grad}{\|grad\|_2}$ 
```

---
