# Supplementary material
Source: ML conference proceedings conference paper supplement (https://openaccess.thecvf.com/content/WACV2024/html/Hsiao_Natural_Light_Can_WACV_2024_paper.html)
Supplement: Supplementary file 2 [file Hsiao_Natural_Light_Can_WACV_2024_supplemental.zip]

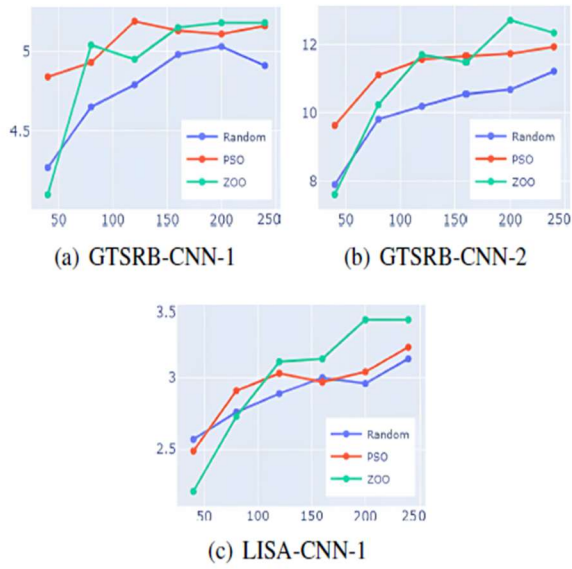

Figure 7. Comparison of our proposed ZOO optimizer to the methods proposed in previous works. (The x-axis represents the change in queries, while the y-axis represents the change in loss.)

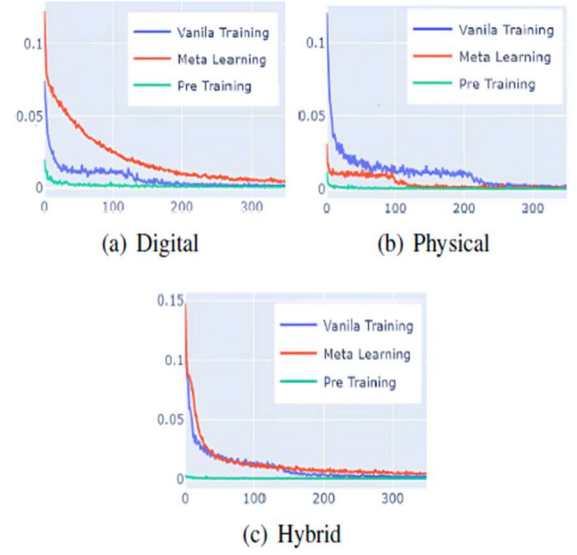

Figure 8. Comparison of how pretraining/meta sources affect adaptation for physical objects. (The x-axis represents the change in iterations, the y-axis represents the change in loss.)
